# Supplementary material
Source: PubMed Central journal article supplement (PMC3658162)
Supplement: NIHMS464024-supplement-1_si_001.pdf [file NIHMS464024-supplement-1_si_001.pdf]

# **Carbon-Binding Designer Proteins that Discriminate Between Graphitic and Diamond Surfaces**

**Brandon Coyle,<sup>1</sup> Marco Rolandi,<sup>2</sup> and François Baneyx<sup>1\*</sup>**

Departments of <sup>1</sup>Chemical Engineering and <sup>2</sup>Materials Science and Engineering,  
Box 351750, University of Washington, Seattle, WA 98195-1750

\* Address correspondence to [baneyx@uw.edu](mailto:baneyx@uw.edu)

**Raman Spectroscopy Analysis of Carbon Allotropes.** The 5 different carbon substrates used in this study were analyzed by Raman spectroscopy (Fig. S1). MWNT, glassy carbon and detonation diamond powders were washed with ddH<sub>2</sub>O, deposited on a glass slide and allowed to dry. Spectra were acquired for 10 seconds on a Renishaw inVia Raman microspectrometer through a Leica DM IRBE optical microscope. A 514 nm argon source was used to irradiate samples through a 50x objective lens. Raman-scattered light was captured on a cooled charge-coupled device. The location of the D peaks and G peaks is consistent with literature values.<sup>1-4</sup>

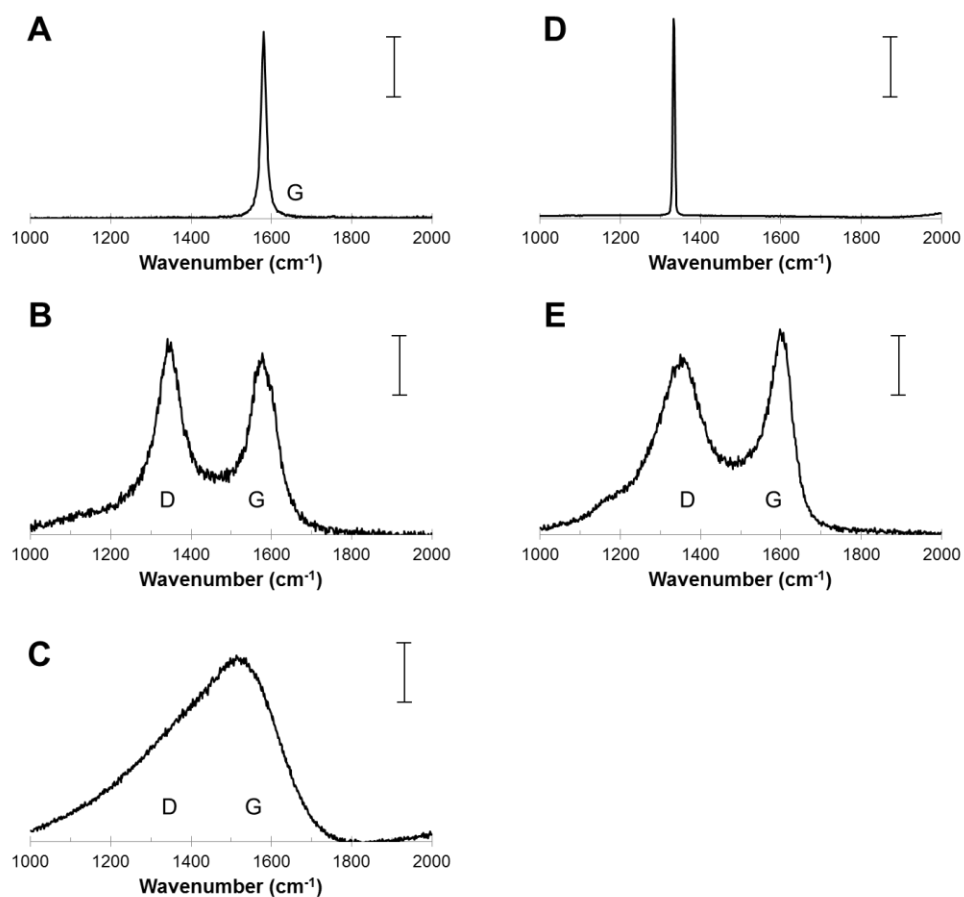

**Figure S1.** Raman spectra of carbon substrates used in this study. (A) HOPG (bar :110 counts/sec); (B) MWNT (bar: 30 counts/sec); (C) evaporated carbon (bar: 160 counts/sec); deconvoluted peaks occur at 1364 and 1536 cm<sup>-1</sup>; (D) diamond powder (bar 3000 counts/sec); (E) glassy carbon powder (bar 55 counts/sec).

**Determination of  $K_d$  by Surface Plasmon Resonance (SPR).** Surface Plasmon Resonance measurements were conducted on homemade SPR glass chips coated with a  $\approx 2$  nm titanium adhesion layer, a  $\approx 48$  nm evaporated gold film, and a  $\approx 4$  nm evaporated carbon film. Chips were cleaned with ethanol and UV-ozone as above and mounted on a 4-channel flow cell SPR sensor from the Institute of Photonics and Electronics (Prague, Czech Republic) which includes temperature control (25°C) and a peristaltic pump for controlled flow at 50  $\mu$ L/min. The SPR design is based on an attenuated total reflection and measures wavelength modulation.

To account for variations in the thickness of deposited carbon films,  $K_d$  values were extracted from sensograms recorded at 4 different concentrations on the same 4-channel SPR chip. We assumed 1<sup>st</sup> order Langmuir association kinetics and determined  $K_d$  from the knowledge of the observable rate constants ( $k_{obs}$ ) at each protein concentration. Briefly, Equation 1 was used to fit each SPR curve using a least squares fit method while varying both  $\sigma_{\infty}$  and  $k_{obs}$ . The  $k_{obs}$  values were plotted as a function of protein concentration (Fig. S2) and a linear fit was used to determine  $k_a$  and  $k_d$  values according to Equation 2. Finally,  $K_d$  was obtained as the ratio of these constants (Equation 3).

$$\sigma_{obs}(t) = \sigma_{\infty}(1 - e^{(-k_{obs}t)}) \quad \text{Equation 1}$$

$$k_{obs} = k_a C + k_d \quad \text{Equation 2}$$

$$K_d = \frac{k_d}{k_a} \quad \text{Equation 3}$$

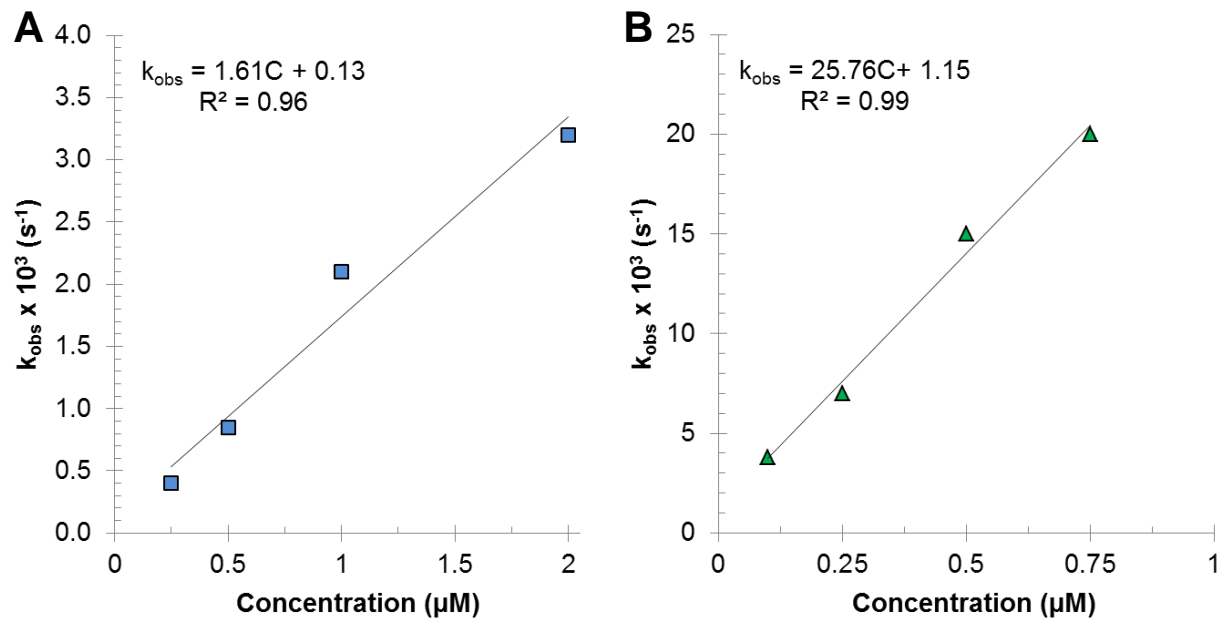

**Figure S2.** Linear fit models used to determine the equilibrium dissociation constant ( $K_d$ ) of TrxA::Car15 (A) or TrxA::Car9 (B) on carbon surfaces through SPR.

### AFM Analysis of the Adsorption of Carbon-Binding TrxA Derivatives to HOPG

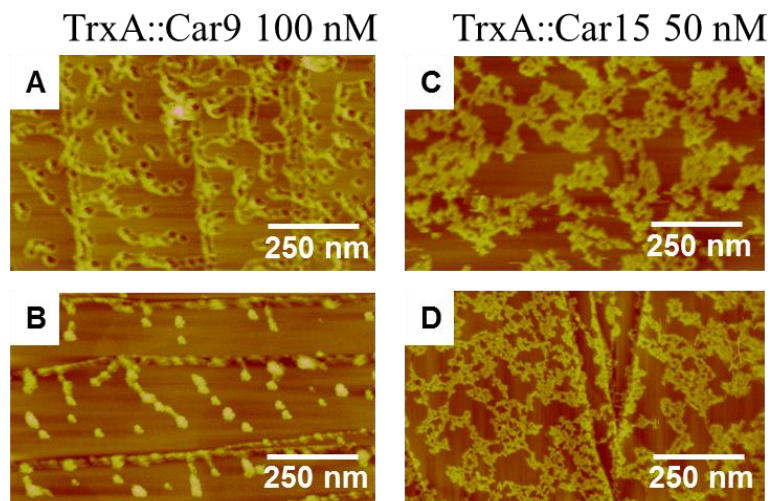

**Figure S3.** AFM images of the adsorption of 100 nM TrxA::Car9 (A and B) and 50 nM TrxA::Car15 (C and D) on freshly cleaved HOPG. All solutions were contacted for 10 min with freshly cleaved HOPG. Surfaces were imaged by AFM after washing with ddH<sub>2</sub>O and drying.

### AFM Analysis of the Adsorption of Authentic TrxA on HOPG

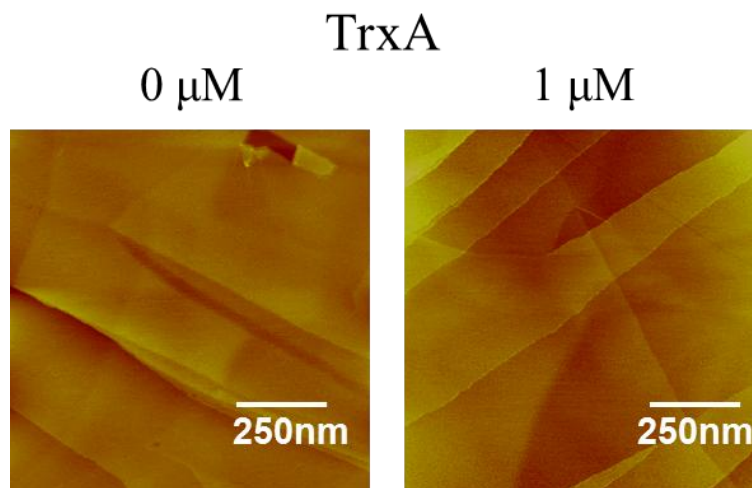

**Figure S4.** Pure 50 mM sodium phosphate buffer pH 7.5 (left) or authentic TrxA at 1 μM concentration were contacted for 10 min with freshly cleaved HOPG. Surfaces were imaged by AFM after washing and drying.

## REFERENCES

1. Chu, P. K.; Li, L., Characterization of amorphous and nanocrystalline carbon films. *Mat. Chem. Phys.* 2006, 96 (2), 253-277.
2. Dresselhaus, M.; Jorio, A.; Saito, R., Characterizing graphene, graphite, and carbon nanotubes by Raman spectroscopy. *Annu. Rev. Condens. Matter Phys.* 2010, 1 (1), 89-108.
3. Knight, D. S.; White, W. B., Characterization of diamond films by Raman spectroscopy. *J. Mater. Res.* 1989, 4 (2), 385-393.
4. Ferrari, A.; Robertson, J., Interpretation of Raman spectra of disordered and amorphous carbon. *Phys. Rev. B* 2000, 61 (20), 14095.
